# Supplementary material
Source: Research Square preprint supplement (doi:10.21203/rs.3.rs-9389596/v1)
Supplement: Supplementary file 1 [file 8b1abcd0ef7c3c9c9b03ee98.xlsx]

## Sheet: Sheet1
Reference	DOI	Wood_Species	Wood_Type	Lignin_Content_%	Cellulose_Content_%	Hemicellulose_Content_%	Ash_Content_%	Raw_Carbon_%	Pyrolysis_Temperature_C	Biochar_Yield_%	Char_Carbon_%	Char_HHV_MJ_kg
Chen et al. (2017)	10.15376/biores.12.4.7750-7767	Birch	Hardwood	19,5	42	33	0,3	47,8	400	33	78	27,3
Chen et al. (2017)	10.15376/biores.12.4.7750-7767	Birch	Hardwood	19,5	42	33	0,3	47,8	500	28	82	28,7
Chen et al. (2017)	10.15376/biores.12.4.7750-7767	Birch	Hardwood	19,5	42	33	0,3	47,8	600	23	86	30,1
Crombie et al. (2015)	10.1111/gcbb.12114	Scots Pine	Softwood	27,91	49,53	21	0,18	46,77	350	40	72	25,92
Crombie et al. (2015)	10.1111/gcbb.12114	Scots Pine	Softwood	27,91	49,53	21	0,18	46,77	450	33	80	28,8
Crombie et al. (2015)	10.1111/gcbb.12114	Scots Pine	Softwood	27,91	49,53	21	0,18	46,77	550	26	88	31,68
Dufour et al. (2011)	10.1016/j.cherd.2011.01.005	Poplar	Hardwood	21	48	25	0,5	46,5	500	26,2	83,5	29,2
Dufour et al. (2011)	10.1016/j.cherd.2011.01.005	Spruce	Softwood	28,5	41	26	0,3	47,5	500	28,5	82	28,7
Liaw et al. (2012)	10.1016/j.fuel.2012.07.035	Douglas Fir	Softwood	26	48	22	0,1	49	300	47,66	68	23,8
Liaw et al. (2012)	10.1016/j.fuel.2012.07.035	Douglas Fir	Softwood	26	48	22	0,1	49	350	44,29	70,6	24,71
Liaw et al. (2012)	10.1016/j.fuel.2012.07.035	Douglas Fir	Softwood	26	48	22	0,1	49	400	39,63	74,15	25,95
Liaw et al. (2012)	10.1016/j.fuel.2012.07.035	Douglas Fir	Softwood	26	48	22	0,1	49	500	31,67	79,74	27,91
Liaw et al. (2012)	10.1016/j.fuel.2012.07.035	Douglas Fir	Softwood	26	48	22	0,1	49	600	24,02	85,34	29,87
Yang et al. ( 2007)	10.1016/j.fuel.2006.12.013	Chestnut	Hardwood	22,5	46	28	0,5	46,8	400	32,19	75,17	26,31
Yang et al. ( 2007)	10.1016/j.fuel.2006.12.013	Chestnut	Hardwood	22,5	46	28	0,5	46,8	500	26,37	81,65	28,58
Yang et al. ( 2007)	10.1016/j.fuel.2006.12.013	Chestnut	Hardwood	22,5	46	28	0,5	46,8	600	21,41	87,94	30,78
Yang et al. ( 2007)	10.1016/j.fuel.2006.12.013	Larch	Softwood	26,8	44,2	24,5	0,25	48,1	400	36,39	75,8	26,53
Yang et al. ( 2007)	10.1016/j.fuel.2006.12.013	Larch	Softwood	26,8	44,2	24,5	0,25	48,1	500	30,08	80,82	28,29
Yang et al. ( 2007)	10.1016/j.fuel.2006.12.013	Larch	Softwood	26,8	44,2	24,5	0,25	48,1	600	24,07	87,62	30,67
Yang et al. ( 2007)	10.1016/j.fuel.2006.12.013	Willow	Hardwood	20	45	29	0,6	47	400	30,31	75,91	26,57
Yang et al. ( 2007)	10.1016/j.fuel.2006.12.013	Willow	Hardwood	20	45	29	0,6	47	500	25,45	81,62	28,57
Yang et al. ( 2007)	10.1016/j.fuel.2006.12.013	Willow	Hardwood	20	45	29	0,6	47	600	19,1	88,29	30,9
Neves et al. (2011)	10.1016/j.pecs.2011.01.004	Poplar	Hardwood	21	48	25	0,5	46,5	400	35	75	26,25
Neves et al. (2011)	10.1016/j.pecs.2011.01.004	Poplar	Hardwood	21	48	25	0,5	46,5	500	31	80	28
Neves et al. (2011)	10.1016/j.pecs.2011.01.004	Poplar	Hardwood	21	48	25	0,5	46,5	600	27	85	29,75
Neves et al. (2011)	10.1016/j.pecs.2011.01.004	Poplar	Hardwood	21	48	25	0,5	46,5	700	23	90	31,5
Neves et al. (2011)	10.1016/j.pecs.2011.01.004	Spruce	Softwood	28,5	41	26	0,3	47,5	400	38	73	25,5
Neves et al. (2011)	10.1016/j.pecs.2011.01.004	Spruce	Softwood	28,5	41	26	0,3	47,5	500	34	78	27,2
Neves et al. (2011)	10.1016/j.pecs.2011.01.004	Spruce	Softwood	28,5	41	26	0,3	47,5	600	30	83	28,9
Neves et al. (2011)	10.1016/j.pecs.2011.01.004	Spruce	Softwood	28,5	41	26	0,3	47,5	700	26	88	30,6
Ronsse et al. (2013)	10.1111/gcbb.12018	Oak	Hardwood	24,5	43	27	0,4	48	300	45	70	25,2
Ronsse et al. (2013)	10.1111/gcbb.12018	Oak	Hardwood	24,5	43	27	0,4	48	450	34,5	79	28,44
Ronsse et al. (2013)	10.1111/gcbb.12018	Oak	Hardwood	24,5	43	27	0,4	48	600	24	88	31,68
Ronsse et al. (2013)	10.1111/gcbb.12018	Scots Pine	Softwood	27,91	49,53	21	0,18	46,77	300	52	65	22,1
Ronsse et al. (2013)	10.1111/gcbb.12018	Scots Pine	Softwood	27,91	49,53	21	0,18	46,77	450	38,5	75,5	25,67
Ronsse et al. (2013)	10.1111/gcbb.12018	Scots Pine	Softwood	27,91	49,53	21	0,18	46,77	600	25	86	29,24
Özbay (2012)	10.17341/gummfd.38605	Oriental Beech	Hardwood	18,04	45,54	32	0,48	43,09	400	32,8	84,1	29,65
Özbay (2012)	10.17341/gummfd.38605	Oriental Beech	Hardwood	18,04	45,54	32	0,48	43,09	500	27,1	86,5	30,5
Özbay (2012)	10.17341/gummfd.38605	Oriental Beech	Hardwood	18,04	45,54	32	0,48	43,09	600	25	89	31,8
Özbay (2012)	10.17341/gummfd.38605	Scots Pine	Softwood	27,91	49,53	21	0,18	46,77	400	39,8	79,36	27,47
Özbay (2012)	10.17341/gummfd.38605	Scots Pine	Softwood	27,91	49,53	21	0,18	46,77	500	31	82,5	29,5
Özbay (2012)	10.17341/gummfd.38605	Scots Pine	Softwood	27,91	49,53	21	0,18	46,77	600	25,2	88	31,5
